# Supplementary material for: Reconstruction of Rift Valley fever transmission dynamics in Madagascar: estimation of force of infection from seroprevalence surveys using Bayesian modelling
Source: PubMed Central journal article supplement (PMC5209714; doi:10.1038/srep39870), 2017-01-04
Supplement: srep39870-s1.pdf [file srep39870-s1.pdf]

Reconstruction of Rift Valley fever transmission dynamics in Madagascar: estimation of force of infection from seroprevalence surveys using Bayesian modelling

Marie-Marie Olive, Vladimir Grosbois, Annelise Tran, Lalaina Arivony Nomenjanahary, Mihaja Rakotoarinoro, Soa-Fy Andriamandimby, Christophe Rogier, Jean-Michel Heraud, Veronique Chevalier

Supplementary material 1 : Bayesian hierarchical models

### *Organization of the data*

For each animal, depending on the year of birth and the year of sampling, its exposure to RVFV over each year from mid-1992 to mid-2014 was determined as following:

1. for the period of mid-1992 to mid-2002, for each animal we considered the number of years of exposure;
2. for the other years, if the animal was present during the year considered, its exposure was 1 and 0 if not.

Two examples are provided in the table below:

1. an animal of 8 years old sampled mid-2008, was considered born in mid-2000. We thus considered that it was exposed 2 years during the period of mid-1992/mid-2002 (mid-2000/mid-2001 and mid-2001/mid-2002), and exposed each year from mid-2002/mid-2003 to mid-2007/mid-2008 but not exposed from mid-2008/mid-2009 to mid-2013/mid-2014.
2. an animal of 5 years old sampled in mid-2014, was considered born in mid-2009. It was not exposed to RVFV before mid-2009, and then each year from mid-2009/mid-2010 to mid-2013/mid-2014.

| DOB      | DOS      | mid-1992 to mid-2002 | mid-2002/ mid-2003 | mid-2003/ mid-2004 | mid-2004/ mid-2005 | mid-2005/ mid-2006 | mid-2006/ mid-2007 | mid-2007/ mid-2008 | mid-2008/ mid-2009 | mid-2009/ mid-2010 | mid-2010/ mid-2011 | mid-2011/ mid-2012 | mid-2012/ mid-2013 | mid-2013/ mid-2014 |
|----------|----------|----------------------|--------------------|--------------------|--------------------|--------------------|--------------------|--------------------|--------------------|--------------------|--------------------|--------------------|--------------------|--------------------|
| Mid-2000 | Mid-2008 | 2                    | 1                  | 1                  | 1                  | 1                  | 1                  | 1                  | 0                  | 0                  | 0                  | 0                  | 0                  | 0                  |
| Mid-2009 | Mid-2014 | 0                    | 0                  | 0                  | 0                  | 0                  | 0                  | 0                  | 0                  | 1                  | 1                  | 1                  | 1                  | 1                  |
| ...      | ...      | ...                  | ...                | ...                | ...                | ...                | ...                | ...                | ...                | ...                | ...                | ...                | ...                | ...                |

DOB : Date of birth

DOS: Date of sampling

### ***Model***

The status  $s_{yal}$  according to the serological test of an individual sampled in year  $y$  at age  $a$  in locality  $l$  was considered as a random variable distributed according to a Bernouilli law of parameter  $pa_{yal}$  (Equation 1).

$$s_{yal} \sim \text{Bernouilli}(pa_{yal}) \quad (1)$$

The probability of a positive test result,  $pa_{yal}$ , was then related to the probability of an individual being seropositive  $pv_{yal}$  and to the sensitivity ( $Se_i$ ) and specificity ( $Sp_i$ ) of the serological tests used (Dohoo et al., 2012; Equation 2)

$$pa_{yal} = pv_{yal} \times Se_i + (1 - pv_{yal}) \times (1 - Sp_i) \quad (2)$$

For any individual,  $pv_{yal}$  was considered as the complement of the probability of being seronegative at the year of sampling  $y$  and thus the complement of the probability of never having been infected from the year of birth  $y-a$  to the year of sampling  $y$ . This last probability is the product of the probabilities for a susceptible individual of not getting infected over each year from its year of birth  $y-a$  to the year of sampling  $y$ . Each of these probabilities is the complement of an annual force of infection  $\lambda_y^l$  (the probability of a susceptible individual to

get infected over a year  $y$  in locality  $l$ ). The above reasoning can then be translated into the equation 3.

$$pv_{yal} = 1 - \prod_{i=1}^{i=a} (1 - \lambda_{y-i}^l) \quad (3)$$

Finally,  $\lambda_y^l$  was considered as a random variable distributed according a Beta law (probability distribution defined on the interval  $[0, 1]$ ) of parameters  $\alpha$  and  $\beta$  (Equation4).

$$\lambda_y^l \sim \text{Beta}(\alpha, \beta) \quad (4)$$

For each model, the priors distributions assigned to the FOI parameters were uninformative beta distributions of parameters  $\alpha=1$  and  $\beta=1$ .

### ***Script on OpenBugs***

#### ***Acronyms***

*binary variables indicating exposure for each year*

p92\_02 = mid-1992 to mid-2002

p02 = mid-2002/mid-2003

p03 = mid-2003/mid-2004

p04 = mid-2004/mid-2005

p05= mid-2005/mid-2006

p06= mid-2006/mid-2007

p07= mid-2007/mid-2008

p08= mid-2008/mid-2009

p09= mid-2009/mid-2010

p10= mid-2010/mid-2011

p11= mid-2011/mid-2012

p12= mid-2012/mid-2013

p13= mid-2013/mid-2014

pa = probability of a positive test result

pv = probability of being seropositive

Se = sensibility of the serological test

Sp = specificity of the serological test

*Force of infections ( $\lambda$ )*

l92\_02e = FOI mid-1992 to mid-2002 in the east region

l02e = FOI mid-2002/mid-2003 in the east region

l03e = FOI mid-2003/mid-2004 in the east region

l04e = FOI mid-2004/mid-2005 in the east region

l05e = FOI mid-2005/mid-2006 in the east region

l06e = FOI mid-2006/mid-2007 in the east region

l07e = FOI mid-2007/mid-2008 in the east region

l08e = FOI mid-2008/mid-2009 in the east region

l09e = FOI mid-2009/mid-2010 in the east region

l10e = FOI mid-2010/mid-2011 in the east region

l11e = FOI mid-2011/mid-2012 in the east region

l12e = FOI mid-2012/mid-2013 in the east region

l13e = FOI mid-2013/mid-2014 in the east region

l92\_02h = FOI mid-1992 to mid-2002 in the highlands

l02h = FOI mid-2002/mid-2003 in the highlands

l03h = FOI mid-2003/mid-2004 in the highlands

l04h = FOI mid-2004/mid-2005 in the highlands

l05h = FOI mid-2005/mid-2006 in the highlands

l06h = FOI mid-2006/mid-2007 in the highlands

l07h = FOI mid-2007/mid-2008 in the highlands

l08h = FOI mid-2008/mid-2009 in the highlands

l09h = FOI mid-2009/mid-2010 in the highlands

l10h = FOI mid-2010/mid-2011 in the highlands

l11h = FOI mid-2011/mid-2012 in the highlands

l12h = FOI mid-2012/mid-2013 in the highlands

l13h = FOI mid-2013/mid-2014 in the highlands

lp92\_02n = FOI mid-1992 to mid-2002 in the north-west region

l02n = FOI mid-2002/mid-2003 in the north-west region

l03n = FOI mid-2003/mid-2004 in the north-west region

l04n = FOI mid-2004/mid-2005 in the north-west region

l05n = FOI mid-2005/mid-2006 in the north-west region

l06n = FOI mid-2006/mid-2007 in the north-west region

l07n = FOI mid-2007/mid-2008 in the north-west region

l08n = FOI mid-2008/mid-2009 in the north-west region

l09n = FOI mid-2009/mid-2010 in the north-west region

l10n = FOI mid-2010/mid-2011 in the north-west region

l11n = FOI mid-2011/mid-2012 in the north-west region

l12n = FOI mid-2012/mid-2013 in the north-west region

l13n = FOI mid-2013/mid-2014 in the north-west region

lp92\_02s = FOI mid-1992 to mid-2002 in the south-west region

l02s = FOI mid-2002/mid-2003 in the south-west region

l03s = FOI mid-2003/mid-2004 in the south-west region

l04s = FOI mid-2004/mid-2005 in the south-west region

l05s = FOI mid-2005/mid-2006 in the south-west region

l06s = FOI mid-2006/mid-2007 in the south-west region

l07s = FOI mid-2007/mid-2008 in the south-west region

l08s = FOI mid-2008/mid-2009 in the south-west region

l09s = FOI mid-2009/mid-2010 in the south-west region

l10s = FOI mid-2010/mid-2011 in the south-west region

l11s = FOI mid-2011/mid-2012 in the south-west region

l12s = FOI mid-2012/mid-2013 in the south-west region

l13s = FOI mid-2013/mid-2014 in the south-west region

***Model 1: FOI did neither vary over space, nor over time (null model).***

According to this model, considering that the FOI was constant over years, the probability of being seronegative is the probability of not getting infected over a year (complement of the annual force of infection  $\lambda$ ) at the power age of the animal.

$$pv_{yal} = 1 - [(1 - \lambda)^{age}]$$

**model**

**{**

**for (i in 1:2572)**

**{**

**Y[i]~dbin(pa[i],1)**

```

pa[i]<-pv[i]*Se[i]+(1-pv[i])*(1-Sp[i])
pv[i]<-1-pow((1-l),age[i])

#step Se
#if test=1 then Se=Se1=97.2% else Se=Se2=93.3%
#step Sp
#if test=1 then Sp=Sp1=100% else Sp=Sp2=100%

Se[i]<-(step(test[i]-1)*0.972)+(1-step(test[i]-1))*(0.933)
Sp[i]<-(step(test[i]-1)*1)+(1-step(test[i]-1))*(1)

}
l~dbeta(1,1)

}

```

*Model 2: the FOI varied over the four eco-regions but not over time.*

This model differs slightly from the Model 1, because the force of infection varies across regions but not over years.

```

model
{
## East ##
for (i in 1:327)
{
Y[i]~dbin(pa[i],1)

```

```
pa[i]<-pv[i]*Se[i]+(1-pv[i])*(1-Sp[i])
```

```
pv[i]<-1-pow((1-l1),age[i])
```

```
#step Se
```

```
#if test=1 then Se=Se1=97.2% else Se=Se2=93.3%
```

```
#step Sp
```

```
#if test=1 then Sp=Sp1=100% else Sp=Sp2=100%
```

```
Se[i]<-(step(test[i]-1)*0.972)+(1-step(test[i]-1))*(0.933)
```

```
Sp[i]<-(step(test[i]-1)*1)+(1-step(test[i]-1))*(1)
```

```
}
```

```
##Highlands ##
```

```
for (j in 328:1113)
```

```
{
```

```
Y[j]~dbin(pa[j],1)
```

```
pa[j]<-pv[j]*Se[j]+(1-pv[j])*(1-Sp[j])
```

```
pv[j]<-1-pow((1-l2),age[j])
```

```
#step Se
```

```
#if test=1 then Se=Se1=97.2% else Se=Se2=93.3%
```

```
#step Sp
```

```
#if test=1 then Sp=Sp1=100% else Sp=Sp2=100%
```

```
Se[j]<-(step(test[j]-1)*0.972)+(1-step(test[j]-1))*(0.933)
```



```
Sp[j]<-(step(test[j]-1)*1)+(1-step(test[j]-1))*(1)
}
```

```
##North-West##
```

```
for (k in 1114:1582)
```

```
{
```

```
Y[k]~dbin(pa[k],1)
```

```
pa[k]<-pv[k]*Se[k]+(1-pv[k])*(1-Sp[k])
```

```
pv[k]<-1-pow((1-l3),age[k])
```

```
#step Se
```

```
#if test=1 then Se=Se1=97.2% else Se=Se2=93.3%
```

```
#step Sp
```

```
#if test=1 then Sp=Sp1=100% else Sp=Sp2=100%
```

```
Se[k]<-(step(test[k]-1)*0.972)+(1-step(test[k]-1))*(0.933)
```

```
Sp[k]<-(step(test[k]-1)*1)+(1-step(test[k]-1))*(1)
```

```
}
```

```
##South-West##
```

```
for (m in 1583:2572)
```

```
{
```

```
Y[m]~dbin(pa[m],1)
```

```
pa[m]<-pv[m]*Se[m]+(1-pv[m])*(1-Sp[m])
```

```
pv[m]<-1-pow((1-l4),age[m])
```

```
#step Se
```

```
#if test=1 then Se=Se1=97.2% else Se=Se2=93.3%
```

```
#step Sp
```

```
#if test=1 then Sp=Sp1=100% else Sp=Sp2=100%
```

```
Se[m]<-(step(test[m]-1)*0.972)+(1-step(test[m]-1))*(0.933)
```

```
Sp[m]<-(step(test[m]-1)*1)+(1-step(test[m]-1))*(1)
```

```
}
```

```
#Priors lambda
```

```
l1~dbeta(1,1)
```

```
l2~dbeta(1,1)
```

```
l3~dbeta(1,1)
```

```
l4~dbeta(1,1)
```

```
}
```

*Model 3: the FOI varied over time but not over space.*

In this model the FOI is different according to the year considered but does not differ between the region. Let us for example, consider a 5 years old individual sampled in mid-2014 (so born in mid-2009). Its probability of being seronegative is the product of the

probabilities of not getting infected in mid-2009/mid-2010, in mid-2010/mid-2011, in mid-2011/mid-2012, in mid-2012/mid-2013 and in mid-2013/mid-2014.

$$\begin{aligned}
 pv_{yal} = 1 - & \left[ (1 - \lambda_{mid-2013/mid-2014}^l) * (1 - \lambda_{mid-2012/mid-2013}^l) \right. \\
 & * (1 - \lambda_{mid-2011/mid-2012}^l) * (1 - \lambda_{mid-2010/mid-2011}^l) \\
 & \left. * (1 - \lambda_{mid-2009/mid-2010}^l) \right]
 \end{aligned}$$

**model**

{

**for (i in 1:2572)**

{

**Y[i]~dbin(pa[i],1)**

**pa[i]<-pv[i]\*Se[i]+(1-pv[i])\*(1-Sp[i])**

**pv[i]<-1-(pow((1-l92\_02), p92\_02[i])\*pow((1-l02),p02[i])\* pow((1-l03),p03[i])\***

**pow((1-l04),p04[i])\* pow((1-l05),p05[i])\* pow((1-l06),p06[i])\* pow((1-l07),p07[i])\***

**pow((1-l08),p08[i])\* pow((1-l09),p09[i])\* pow((1-l10),p10[i])\* pow((1-l11),p11[i])\***

**pow((1-l12),p12[i])\* pow((1-l13),p13[i]))**

**#step Se**

**#if test=1 then Se=Se1=97.2% else Se=Se2=93.3%**

**#step Sp**

**#if test=1 then Sp=Sp1=100% else Sp=Sp2=100%**

**Se[i]<-(step(test[i])\*0.972)+(1-step(test[i]))\*(0.963)**

**Sp[i]<-(step(test[i])\*1)+(1-step(test[i]))\*(0.997)**

}

I92\_02 ~dbeta(1,1)

I02~dbeta(1,1)

I03~dbeta(1,1)

I04~dbeta(1,1)

I05~dbeta(1,1)

I06~dbeta(1,1)

I07~dbeta(1,1)

I08~dbeta(1,1)

I09~dbeta(1,1)

I10~dbeta(1,1)

I11~dbeta(1,1)

I12~dbeta(1,1)

I13~dbeta(1,1)

}

*Model 4: the FOI varied over the four eco-regions and over time.*

This model differs slightly from the Model 3, because the force of infection varies across regions as well as over years.

**model**

{

**### East ###**

```

for (i in 1:327)
{
Y[i]~dbin(pa[i],1)
pa[i]<-pv[i]*Se[i]+(1-pv[i])*(1-Sp[i])
pv[i]<-1-(pow((1-l92_02e), p92_02[i])*pow((1-l02e),p02[i])* pow((1-l03e),p03[i])*
pow((1-l04e),p04[i])* pow((1-l05e),p05[i])* pow((1-l06e),p06[i])* pow((1-
l07e),p07[i])* pow((1-l08e),p08[i])* pow((1-l09e),p09[i])* pow((1-l10e),p10[i])*
pow((1-l11e),p11[i])* pow((1-l12e),p12[i])* pow((1-l13e),p13[i]))

#step Se
#if test=1 then Se=Se1=97.2% else Se=Se2=96.3%

#step Sp
#if test=1 then Sp=Sp1=100% else Sp=Sp2=99.7%

Se[i]<-(step(test[i])*0.972)+(1-step(test[i]))*(0.963)
Sp[i]<-(step(test[i])*1)+(1-step(test[i]))*(0.997)

}

### Highlands ###

for (j in 328:1113)
{
Y[j]~dbin(pa[j],1)

```

```

pa[j]<-pv[j]*Se[j]+(1-pv[j])*(1-Sp[j])
pv[j]<-1-(pow((1-l92_02h), p92_02[j])*pow((1-l02h),p02[j])* pow((1-l03h),p03[j])*
pow((1-l04h),p04[j])* pow((1-l05h),p05[j])* pow((1-l06h),p06[j])* pow((1-
l07h),p07[j])* pow((1-l08h),p08[j])* pow((1-l09h),p09[j])* pow((1-l10h),p10[j])*
pow((1-l11h),p11[j])* pow((1-l12h),p12[j])* pow((1-l13h),p13[j]))

```

```

#step Se

```

```

#if test=1 then Se=Se1=97.2% else Se=Se2=96.3%

```

```

#step Sp

```

```

#if test=1 then Sp=Sp1=100% else Sp=Sp2=99.7%

```

```

Se[j]<-(step(test[j])*0.972)+(1-step(test[j]))*(0.963)

```

```

Sp[j]<-(step(test[j])*1)+(1-step(test[j]))*(0.997)

```

```

}

```

```

### clust3 = north-west = n ###

```

```

for (k in 1114:1582)

```

```

{

```

```

Y[k]~dbin(pa[k],1)

```

```

pa[k]<-pv[k]*Se[k]+(1-pv[k])*(1-Sp[k])

```

```

pv[k]<-1-(pow((1-l92_02n), p92_02[k])*pow((1-l02n),p02[k])* pow((1-

```

```

l03n),p03[k])* pow((1-l04n),p04[k])* pow((1-l05n),p05[k])* pow((1-l06n),p06[k])*

```

```
pow((1-l07n),p07[k])* pow((1-l08n),p08[k])* pow((1-l09n),p09[k])* pow((1-  
l10n),p10[k])* pow((1-l11n),p11[k])* pow((1-l12n),p12[k])* pow((1-l13n),p13[k]))
```

```
#step Se
```

```
#if test=1 then Se=Se1=97.2% else Se=Se2=96.3%
```

```
#step Sp
```

```
#if test=1 then Sp=Sp1=100% else Sp=Sp2=99.7%
```

```
Se[k]<-(step(test[k])*0.972)+(1-step(test[k]))*(0.963)
```

```
Sp[k]<-(step(test[k])*1)+(1-step(test[k]))*(0.997)
```

```
}
```

```
### clust4 = south-west = s ###
```

```
for (m in 1583:2572)
```

```
{
```

```
Y[m]~dbin(pa[m],1)
```

```
pa[m]<-pv[m]*Se[m]+(1-pv[m])*(1-Sp[m])
```

```
pv[m]<-1-(pow((1-l92_02s), p92_02[m])*pow((1-l02s),p02[m])* pow((1-  
l03s),p03[m])* pow((1-l04s),p04[m])* pow((1-l05s),p05[m])* pow((1-l06s),p06[m])*  
pow((1-l07s),p07[m])* pow((1-l08s),p08[m])* pow((1-l09s),p09[m])* pow((1-  
l10s),p10[m])* pow((1-l11s),p11[m])* pow((1-l12s),p12[m])* pow((1-l13s),p13[m]))
```

```
#step Se
```

**#if test=1 then Se=Se1=97.2% else Se=Se2=96.3%**

**#step Sp**

**#if test=1 then Sp=Sp1=100% else Sp=Sp2=99.7%**

**Se[m]<-(step(test[m])\*0.972)+(1-step(test[m]))\*(0.963)**

**Sp[m]<-(step(test[m])\*1)+(1-step(test[m]))\*(0.997)**

**}**

**I92\_02e~dbeta(1,1)**

**I02e~dbeta(1,1)**

**I03e~dbeta(1,1)**

**I04e~dbeta(1,1)**

**I05e~dbeta(1,1)**

**I06e~dbeta(1,1)**

**I07e~dbeta(1,1)**

**I08e~dbeta(1,1)**

**I09e~dbeta(1,1)**

**I10e~dbeta(1,1)**

**I11e~dbeta(1,1)**

**I12e~dbeta(1,1)**

**I13e~dbeta(1,1)**

**I92\_02h ~dbeta(1,1)**



**I02h~dbeta(1,1)**

**I03h~dbeta(1,1)**

**I04h~dbeta(1,1)**

**I05h~dbeta(1,1)**

**I06h~dbeta(1,1)**

**I07h~dbeta(1,1)**

**I08h~dbeta(1,1)**

**I09h~dbeta(1,1)**

**I10h~dbeta(1,1)**

**I11h~dbeta(1,1)**

**I12h~dbeta(1,1)**

**I13h~dbeta(1,1)**

**I92\_02n ~dbeta(1,1)**

**I02n~dbeta(1,1)**

**I03n~dbeta(1,1)**

**I04n~dbeta(1,1)**

**I05n~dbeta(1,1)**

**I06n~dbeta(1,1)**

**I07n~dbeta(1,1)**

**I08n~dbeta(1,1)**

**I09n~dbeta(1,1)**

**I10n~dbeta(1,1)**

**I11n~dbeta(1,1)**

**I12n~dbeta(1,1)**

**I13n~dbeta(1,1)**

**I92\_02s ~dbeta(1,1)**

**I02s~dbeta(1,1)**

**I03s~dbeta(1,1)**

**I04s~dbeta(1,1)**

**I05s~dbeta(1,1)**

**I06s~dbeta(1,1)**

**I07s~dbeta(1,1)**

**I08s~dbeta(1,1)**

**I09s~dbeta(1,1)**

**I10s~dbeta(1,1)**

**I11s~dbeta(1,1)**

**I12s~dbeta(1,1)**

**I13s~dbeta(1,1)**

**}**

#### Reference

Dohoo, I.R., Martin, W., Stryhn, H., in *Methods in epidemiologic research*. 96-130 (VER,  
2012)
