# Supplementary material for: Reconstruction of Rift Valley fever transmission dynamics in Madagascar: estimation of force of infection from seroprevalence surveys using Bayesian modelling
Source: PubMed Central journal article supplement (PMC5209714; doi:10.1038/srep39870), 2017-01-04
Supplement: srep39870-s2.pdf [file srep39870-s2.pdf]

Reconstruction of Rift Valley fever transmission dynamics in Madagascar: estimation of force of infection from seroprevalence surveys using Bayesian modelling

Marie-Marie Olive, Vladimir Grosbois, Annelise Tran, Lalaina Arivony Nomenjanahary, Mihaja Rakotoarinoro, Soa-Fy Andriamandimby, Christophe Rogier, Jean-Michel Heraud, Veronique Chevalier

Supplementary material 2 : Number of individuals exposed to RVFV over each year from mid-1992 to mid-2014. For the period of mid-1992 to mid-2002, the number of animals exposed to RVFV were n=50, n=296, n=174, n=158 and n=678 for East, Highlands, North-West, South-West and overall Madagascar respectively.

|            | mid-1992/<br>mid-1993 | mid-1993/<br>mid-1994 | mid-1994/<br>mid-1995 | mid-1995/<br>mid-1996 | mid-1996/<br>mid-1997 | mid-1997/<br>mid-1998 | mid-1998/<br>mid-1999 | mid-1999/<br>mid-2000 | mid-2000/<br>mid-2001 | mid-2001/<br>mid-2002 | mid-2002/<br>mid-2003 | mid-2003/<br>mid-2004 | mid-2004/<br>mid-2005 | mid-2005/<br>mid-2006 | mid-2006/<br>mid-2007 | mid-2007/<br>mid-2008 | mid-2008/<br>mid-2009 | mid-2009/<br>mid-2010 | mid-2010/<br>mid-2011 | mid-2011/<br>mid-2012 | mid-2012/<br>mid-2013 | mid-2013/<br>mid-2014 |
|------------|-----------------------|-----------------------|-----------------------|-----------------------|-----------------------|-----------------------|-----------------------|-----------------------|-----------------------|-----------------------|-----------------------|-----------------------|-----------------------|-----------------------|-----------------------|-----------------------|-----------------------|-----------------------|-----------------------|-----------------------|-----------------------|-----------------------|
| East       | 0                     | 0                     | 2                     | 2                     | 2                     | 2                     | 3                     | 6                     | 13                    | 20                    | 41                    | 57                    | 71                    | 101                   | 128                   | 150                   | 169                   | 102                   | 135                   | 166                   | 196                   | 228                   |
| Highlands  | 0                     | 0                     | 0                     | 0                     | 4                     | 7                     | 12                    | 35                    | 94                    | 144                   | 215                   | 292                   | 373                   | 457                   | 554                   | 600                   | 623                   | 103                   | 134                   | 169                   | 200                   | 230                   |
| North-West | 2                     | 2                     | 2                     | 2                     | 6                     | 6                     | 17                    | 24                    | 47                    | 66                    | 85                    | 114                   | 144                   | 174                   | 232                   | 271                   | 287                   | 101                   | 138                   | 169                   | 200                   | 231                   |
| South-West | 0                     | 0                     | 0                     | 0                     | 2                     | 3                     | 14                    | 18                    | 45                    | 76                    | 132                   | 209                   | 305                   | 400                   | 523                   | 627                   | 695                   | 200                   | 262                   | 324                   | 387                   | 451                   |
| Total      | 2                     | 2                     | 4                     | 4                     | 14                    | 18                    | 46                    | 83                    | 199                   | 306                   | 473                   | 672                   | 893                   | 1132                  | 1437                  | 1648                  | 1774                  | 506                   | 669                   | 828                   | 983                   | 1140                  |
